# Supplementary material for: Structure and properties of an Fe(iii) complex containing a novel amide functionalized polyimidazole ligandElectronic supplementary information (ESI) available: 1H, 13C NMR, UV-vis and FTIR spectra, ESI-mass spectra and cyclic voltammetry. See http://www.rsc.org/suppdata/cc/b2/b204799c/
Source: Royal Society of Chemistry journal article supplement (doi:10.1039/b204799c), 2002-08-23

## Supplementary Information

### Structure and properties of an Fe(III) complex containing a novel amide functionalized polyimidazole ligand.

Lionel E. Cheruzel, Jianping Wang, Mark S. Mashuta and Robert M. Buchanan\*

<sup>a</sup> Department of Chemistry, University of Louisville, Louisville, Kentucky 40292, USA. E-mail: bob.buchanan@louisville.edu

#### Physical Measurements:

Compounds L1, L2, 1 and 2 have been characterized by elemental analysis (Midwest Analytical, Inc.) X-ray diffraction, <sup>1</sup>H, <sup>13</sup>C NMR, UV-visible and FT-IR spectroscopies, electrospray mass spectrometry, and cyclic voltammetry.

Single crystal X-ray diffraction studies were performed using a Bruker Smart Apex diffractometer equipped with a cryoflex low-temperature apparatus, or on an Enraf-Nonius CAD4 diffractometer. Crystallographic data of compounds 1 and 2 were recorded at 293 and 100K, respectively.

<sup>1</sup>H, <sup>13</sup>C NMR spectra of L2 in CDCl<sub>3</sub> were recorded using a Varian Unity Inova 500 MHz NMR spectrometer at room temperature. UV-vis spectra of compounds 1 and 2 (1x10<sup>-4</sup>M in CH<sub>3</sub>CN) were recorded using a Cary 50 Bio spectrophotometer. FT-IR spectrum of L2 was recorded using a Mattson Galaxy Series FTIR 5000 spectrophotometer. A chloroform solution of L2 was evaporated on Ag/AgCl plates prior to recording the spectrum. Positive ion mode electrospray mass spectra of compounds L2 and 1 were recorded using Micromass Mass Spectrometer Electrospray Triple Quadrupole Quattro LCZ.

Cyclic voltammograms of compounds 1 and 2 (1x10<sup>-3</sup>M in CH<sub>3</sub>CN) containing 0.1 M TBAP were recorded using a standard three-electrode cell which included a glassy carbon working electrode, Pt-coil auxiliary electrode and a Ag/AgCl reference electrode. The electrochemical measurements were recorded using a PARC Model 175 programmer; Model 173 potentiostat/gavanostat and Houston 2000 X-Y recorder.

## Structure and Formula

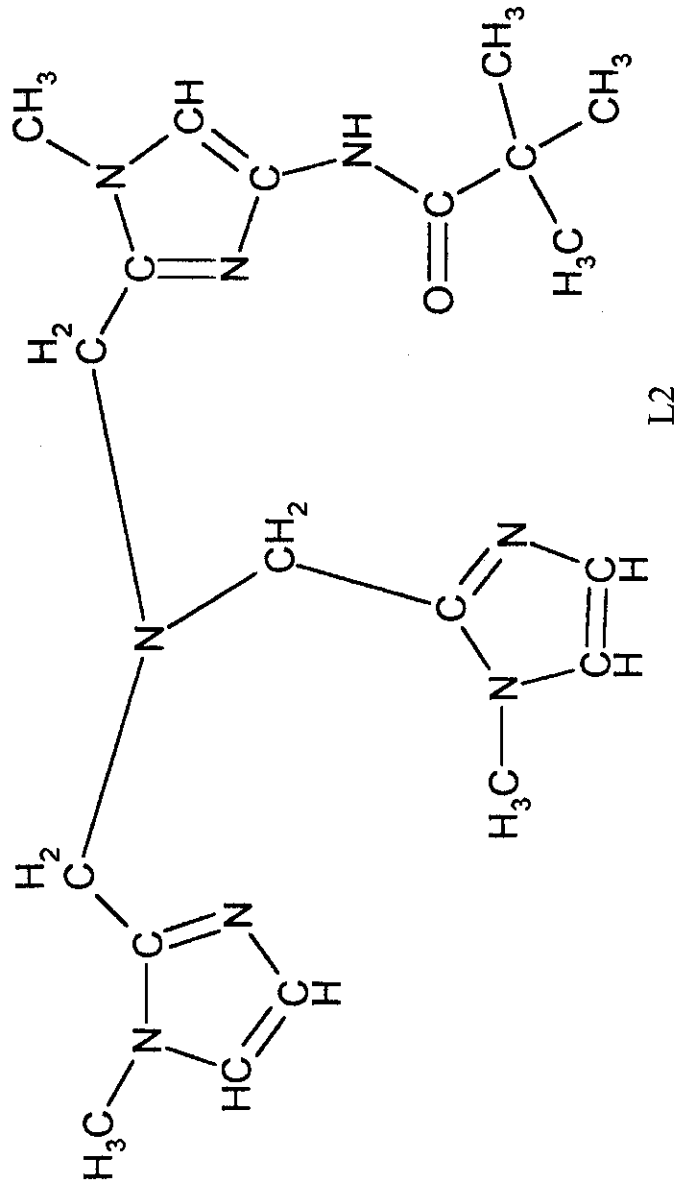

Molecular Weight 398.52

Molecular Formula C<sub>20</sub>H<sub>30</sub>N<sub>8</sub>O

Elemental Analysis C<sub>20</sub>H<sub>30</sub>N<sub>8</sub>O · H<sub>2</sub>O

Calcd. : C 57.69, H 7.69, N 26.92

Found: C 58.00, H 7.94, N 27.04

(water detected in proton spectrum of compound in CDCl<sub>3</sub>)

ESI-MS 399.2 (M+H<sup>+</sup>)

<sup>1</sup>H NMR in CDCl<sub>3</sub>

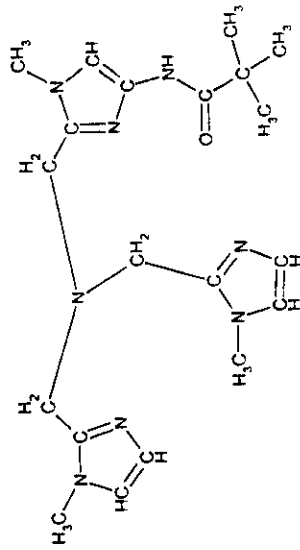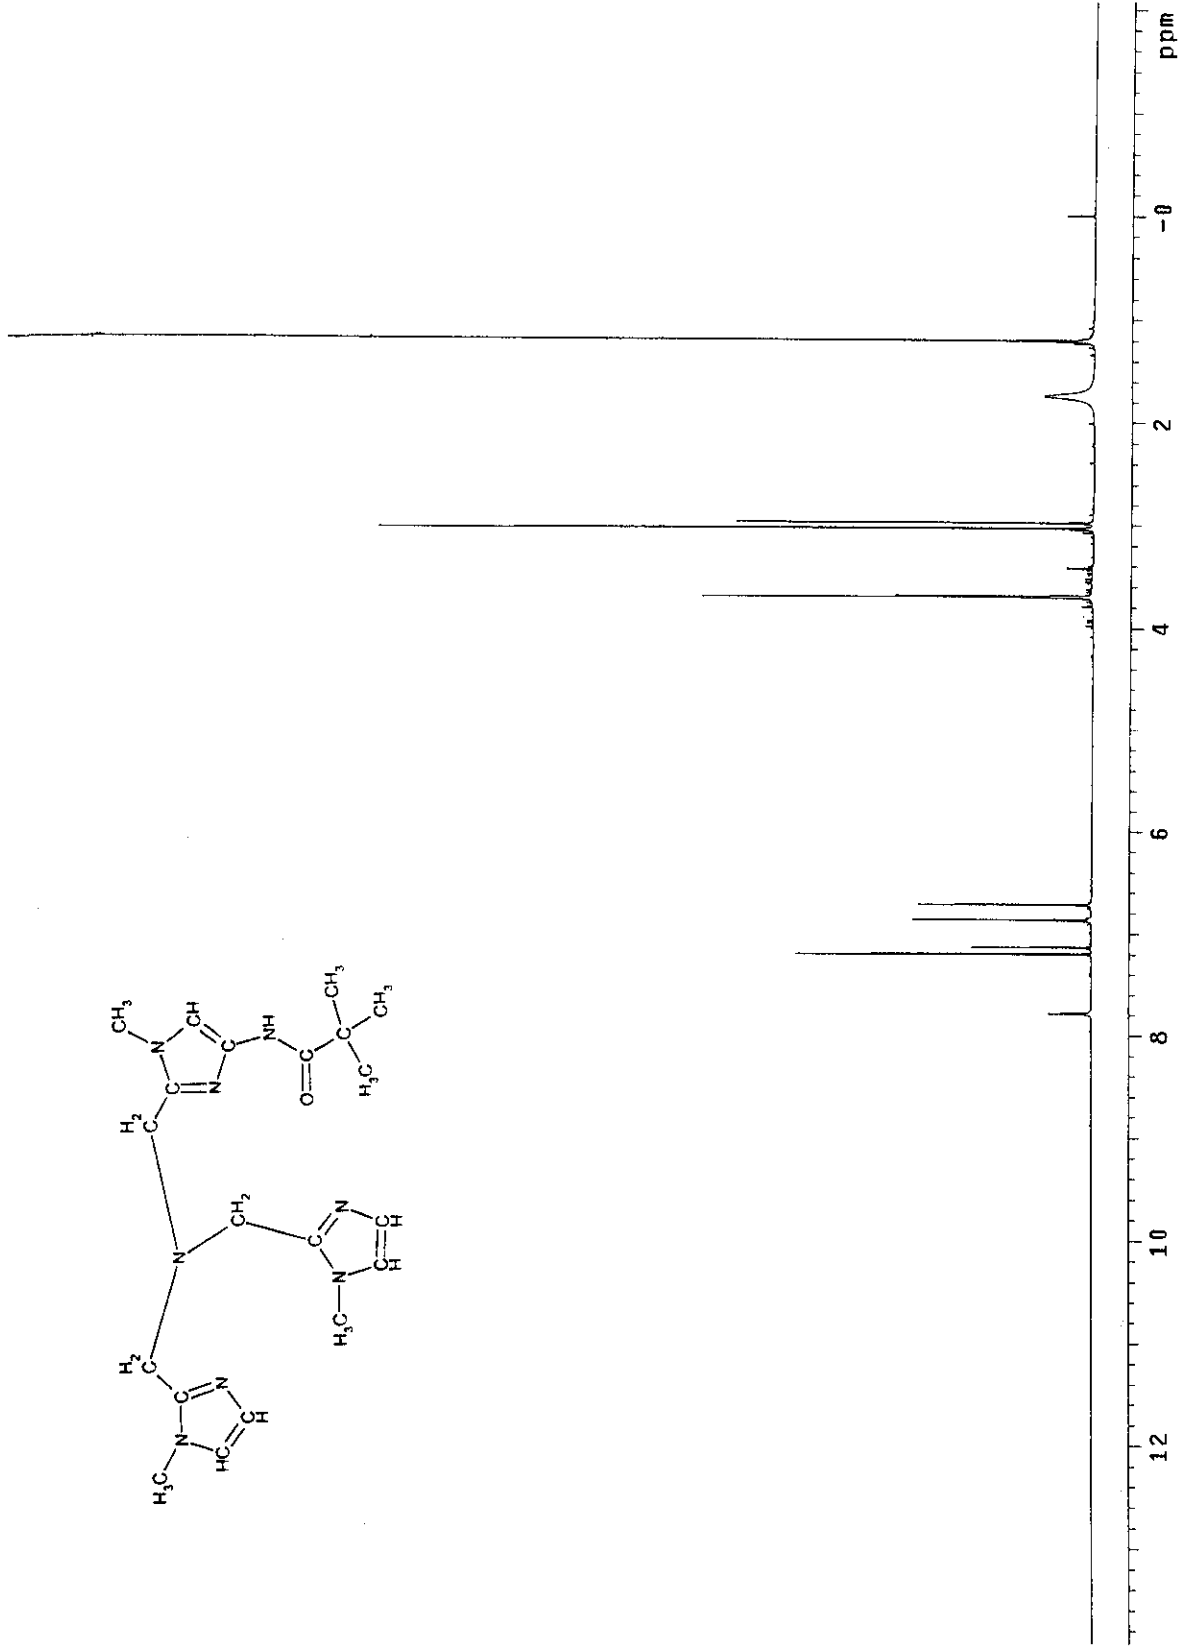

$^{13}\text{C}$  NMR in  $\text{CDCl}_3$

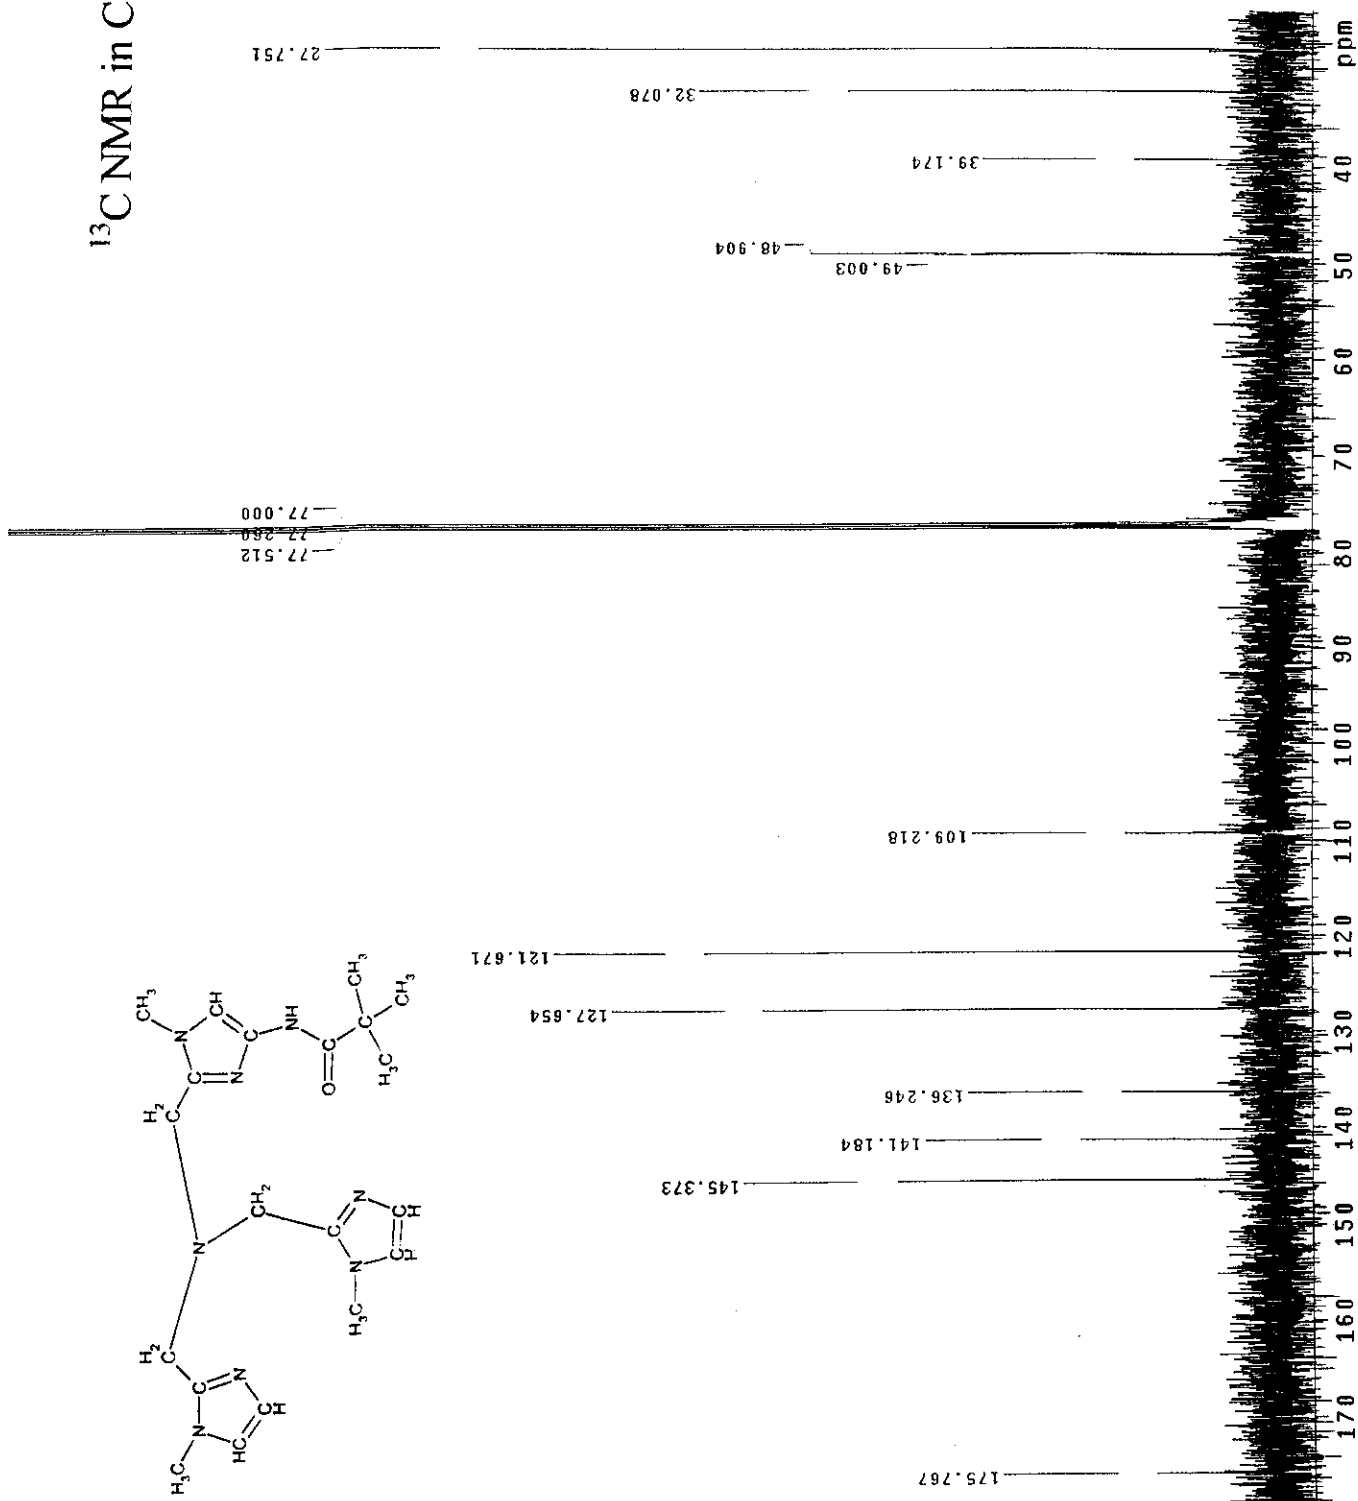

# NMR spectroscopic data

$^1\text{H}$  NMR in  $\text{CDCl}_3$

L2

| ppm  | Assignment                              | Integral | Multiplicity |
|------|-----------------------------------------|----------|--------------|
| 7.8  | $^{\text{Am}}\text{Im}(-\text{NH}-)$    | 1        | s            |
| 7.21 | $^{\text{Am}}\text{Im}(\text{C5-H})$    | 1        | s            |
| 6.95 | $\text{Im}(\text{C5-H})$                | 1        | s            |
| 6.8  | $\text{Im}(\text{C4-H})$                | 1        | s            |
| 3.78 | $\text{Im}(-\text{CH}_2-)$              | 4        | s            |
| 3.77 | $^{\text{Am}}\text{Im}(-\text{CH}_2-)$  | 2        | s            |
| 3.11 | $\text{Im}(\text{N-CH}_3-)$             | 6        | s            |
| 3.05 | $^{\text{Am}}\text{Im}(\text{N-CH}_3-)$ | 3        | s            |
| 1.29 | $^{\text{Am}}\text{Im}(\text{tBu})$     | 9        | s            |

$^{13}\text{C}$  NMR in  $\text{CDCl}_3$

| ppm   | Assignment                                                              |
|-------|-------------------------------------------------------------------------|
| 175.8 | $^{\text{Am}}\text{Im}(-\text{C}=\text{O})$                             |
| 145.4 | $\text{Im}(\text{C2})$                                                  |
| 141.2 | $^{\text{Am}}\text{Im}(\text{C2})$                                      |
| 136.3 | $^{\text{Am}}\text{Im}(\text{C4})$                                      |
| 127.7 | $\text{Im}(\text{C5})$                                                  |
| 121.7 | $\text{Im}(\text{C4})$                                                  |
| 109.2 | $^{\text{Am}}\text{Im}(\text{C5})$                                      |
| 48.9  | $\text{Im}(-\text{CH}_2-),$<br>$^{\text{Am}}\text{Im}(-\text{CH}_2-)$   |
| 39.2  | $^{\text{Am}}\text{Im}(\text{tBu-C})$                                   |
| 32.1  | $\text{Im}(\text{N-CH}_3-),$<br>$^{\text{Am}}\text{Im}(\text{N-CH}_3-)$ |
| 27.8  | $^{\text{Am}}\text{Im}(\text{tBu})$                                     |

$^{\text{Am}}\text{Im}$  corresponds to the amide functionalized imidazole ring

# UV-visible Spectra of Compounds 1 and 2

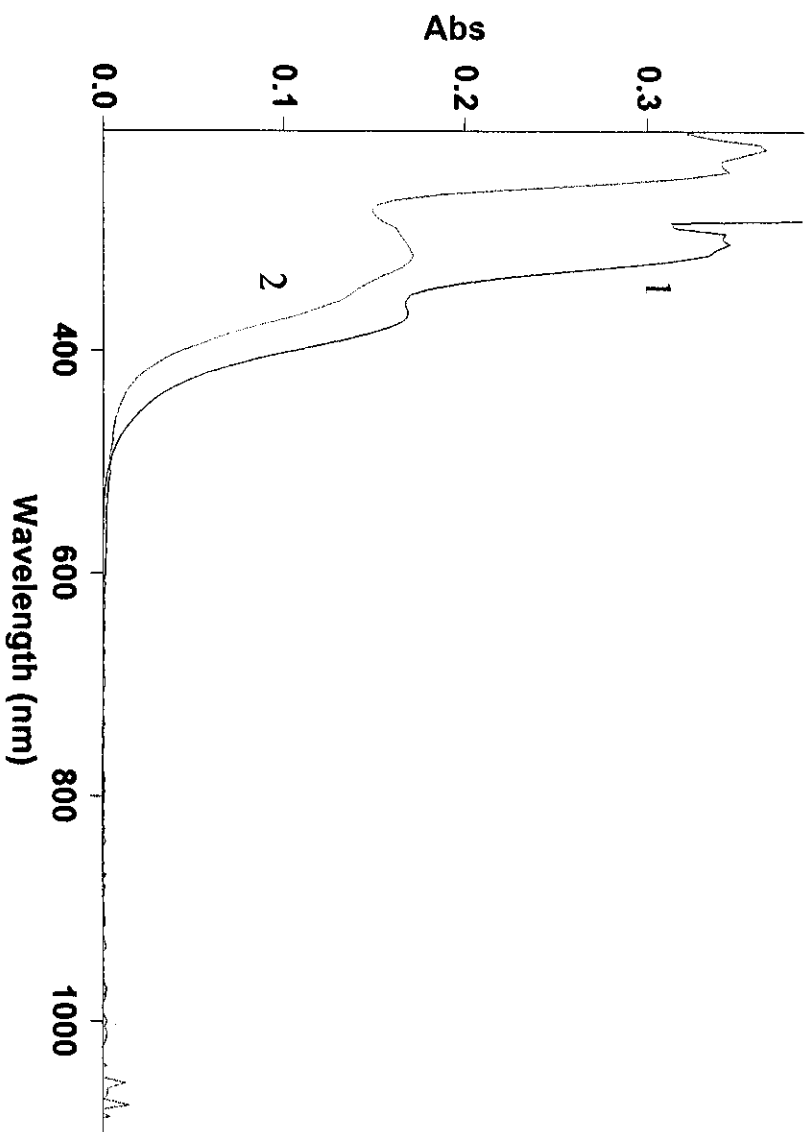

# FT-IR Spectrum of L2

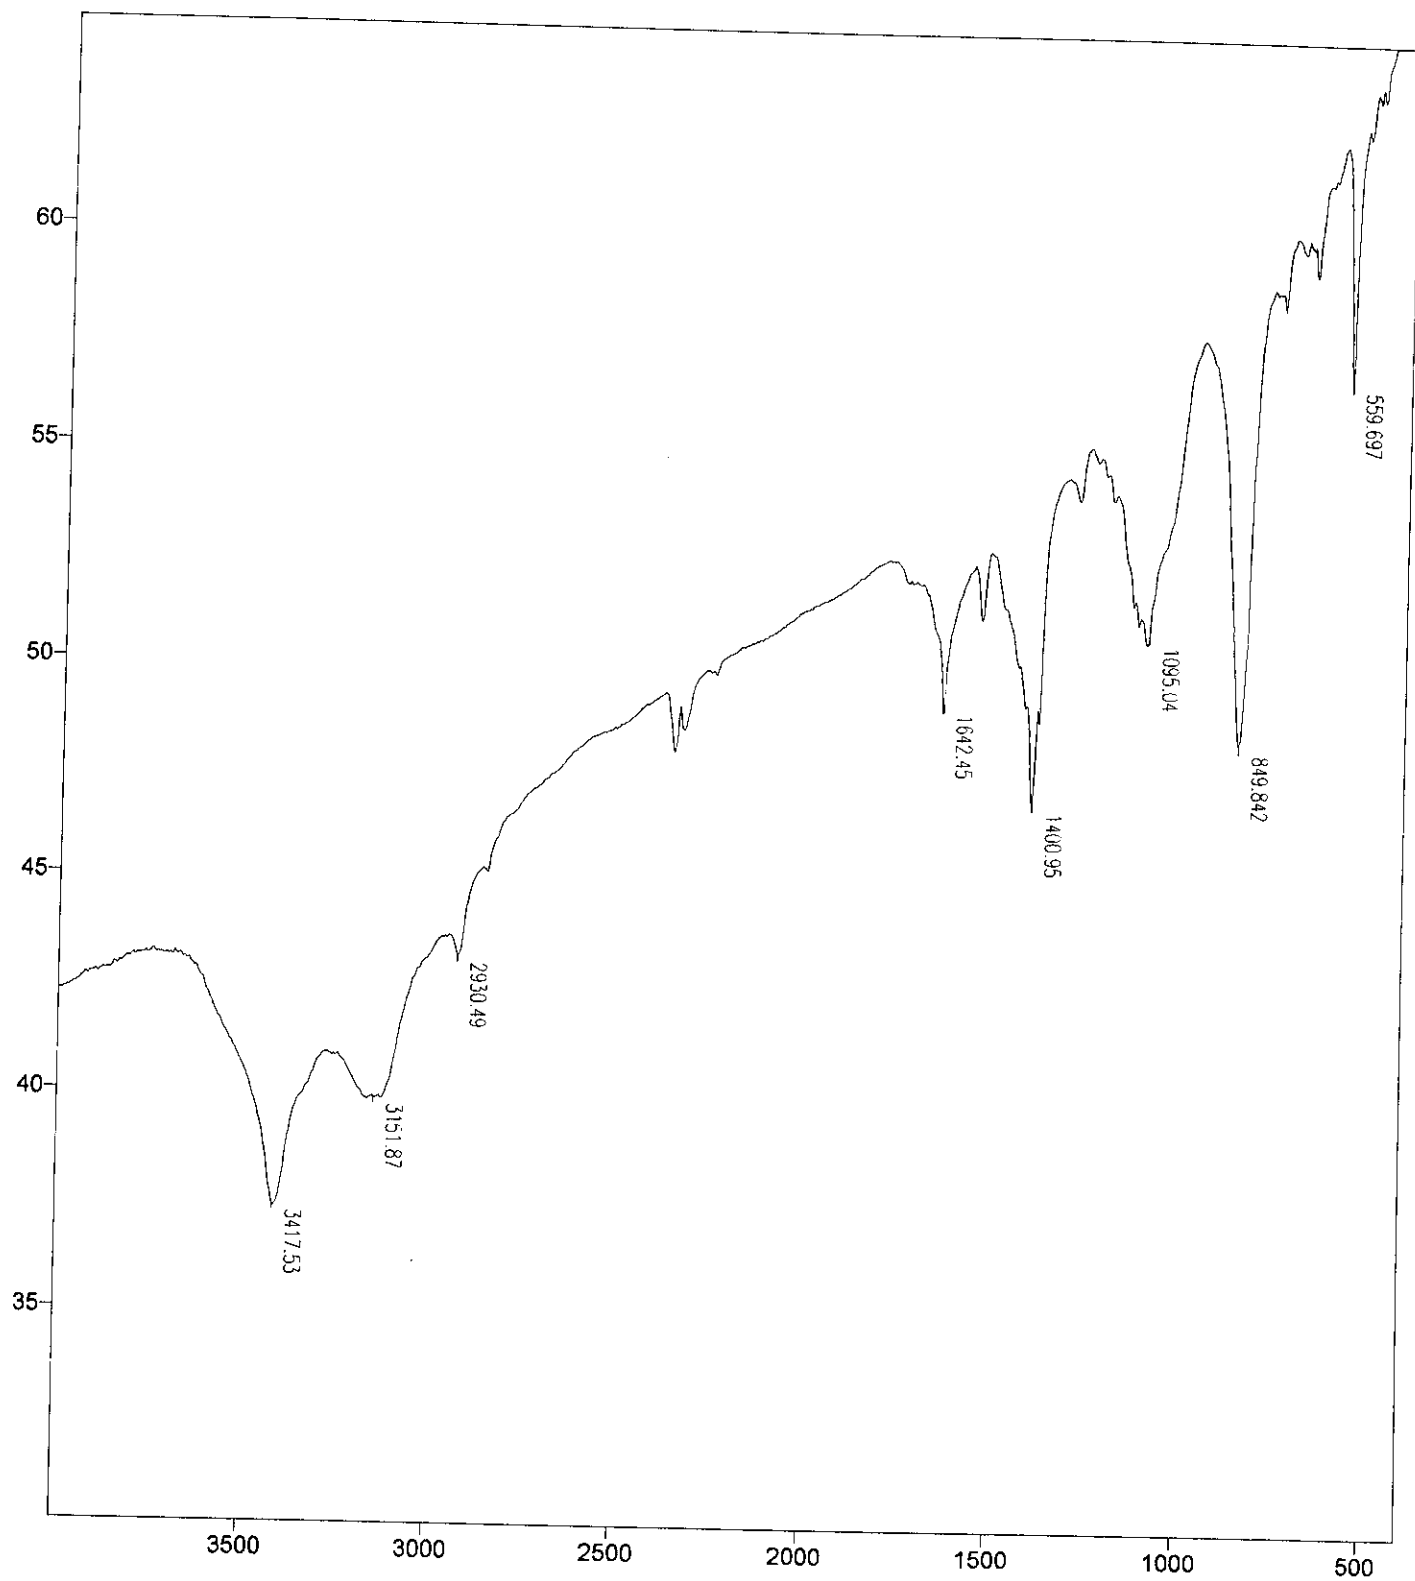

ESI-MS

Molecular Ion

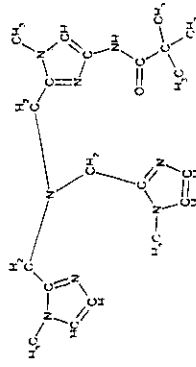

Scan ES+  
7.73e12

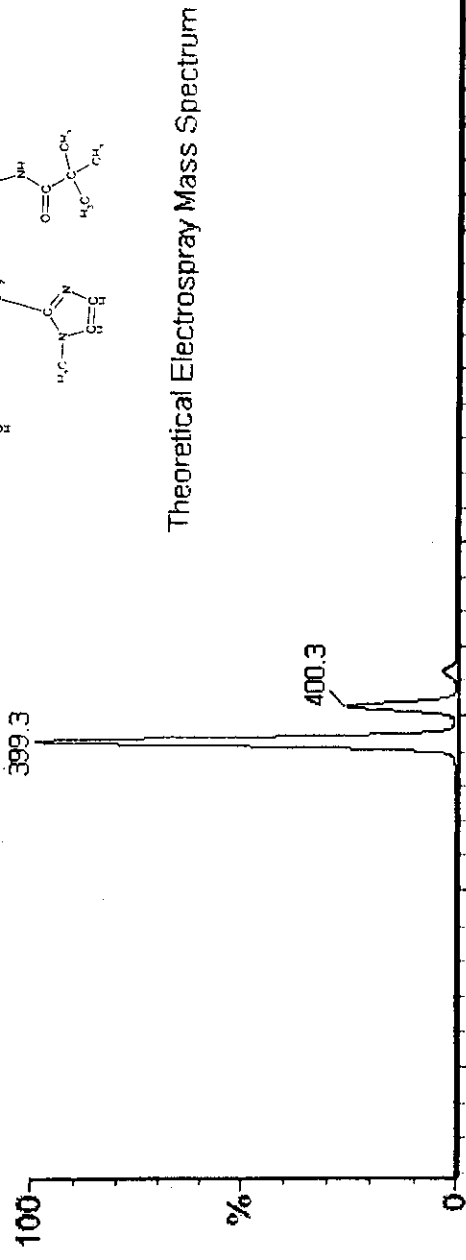

Scan ES+  
2.68e8

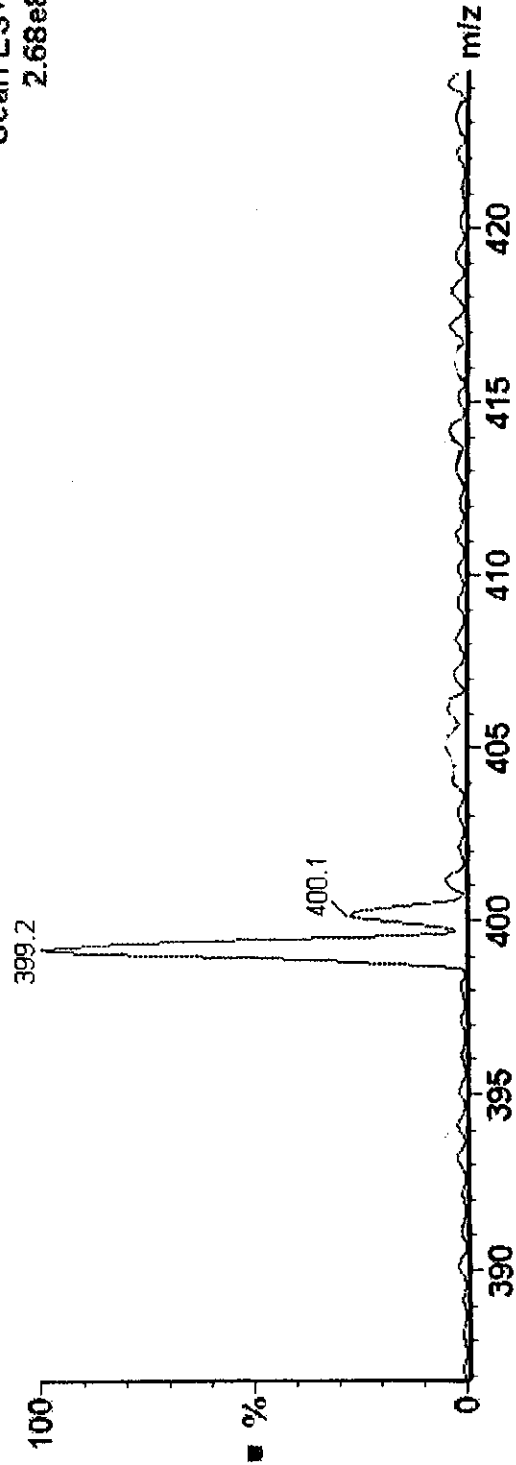



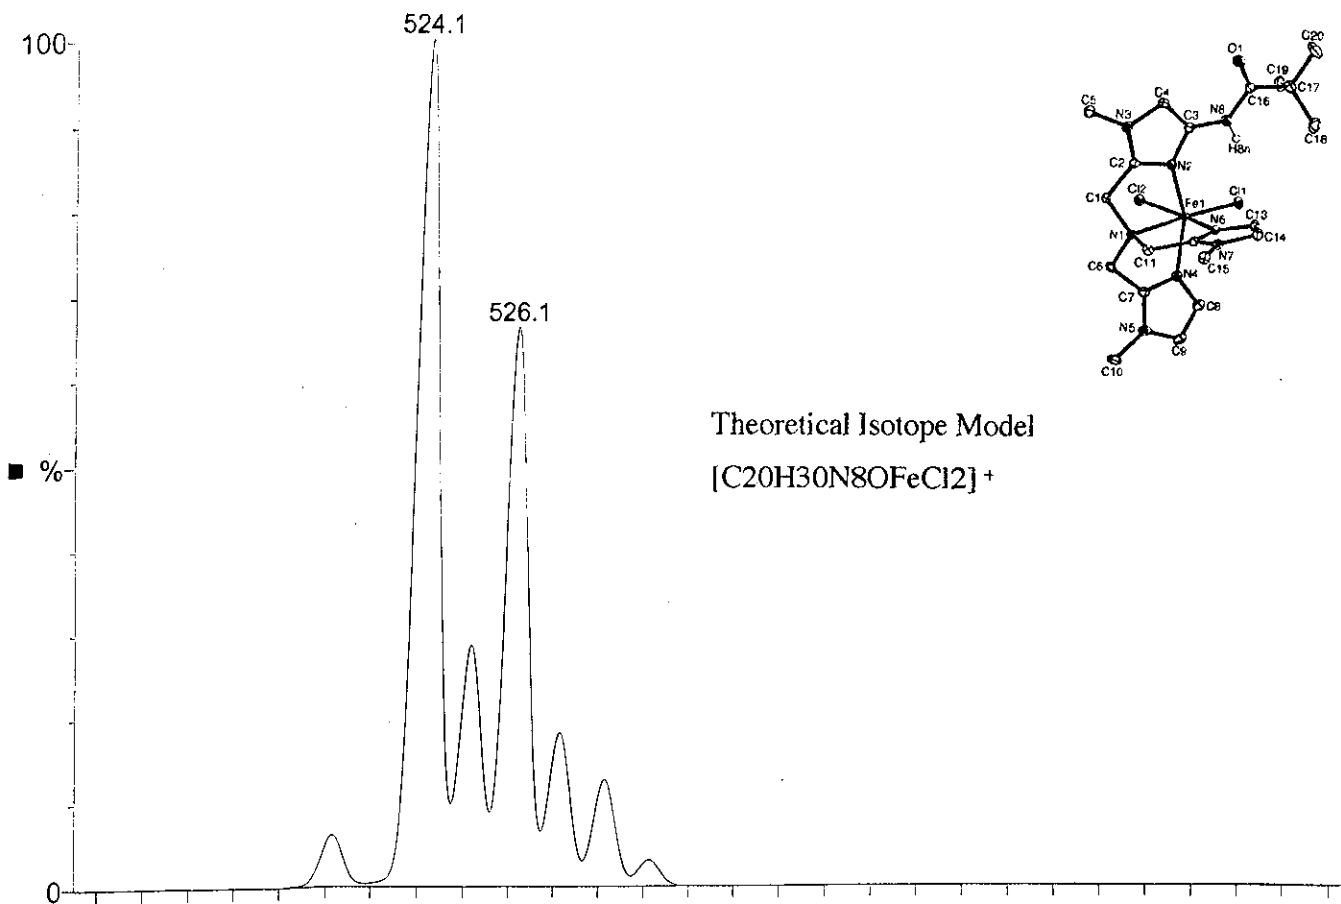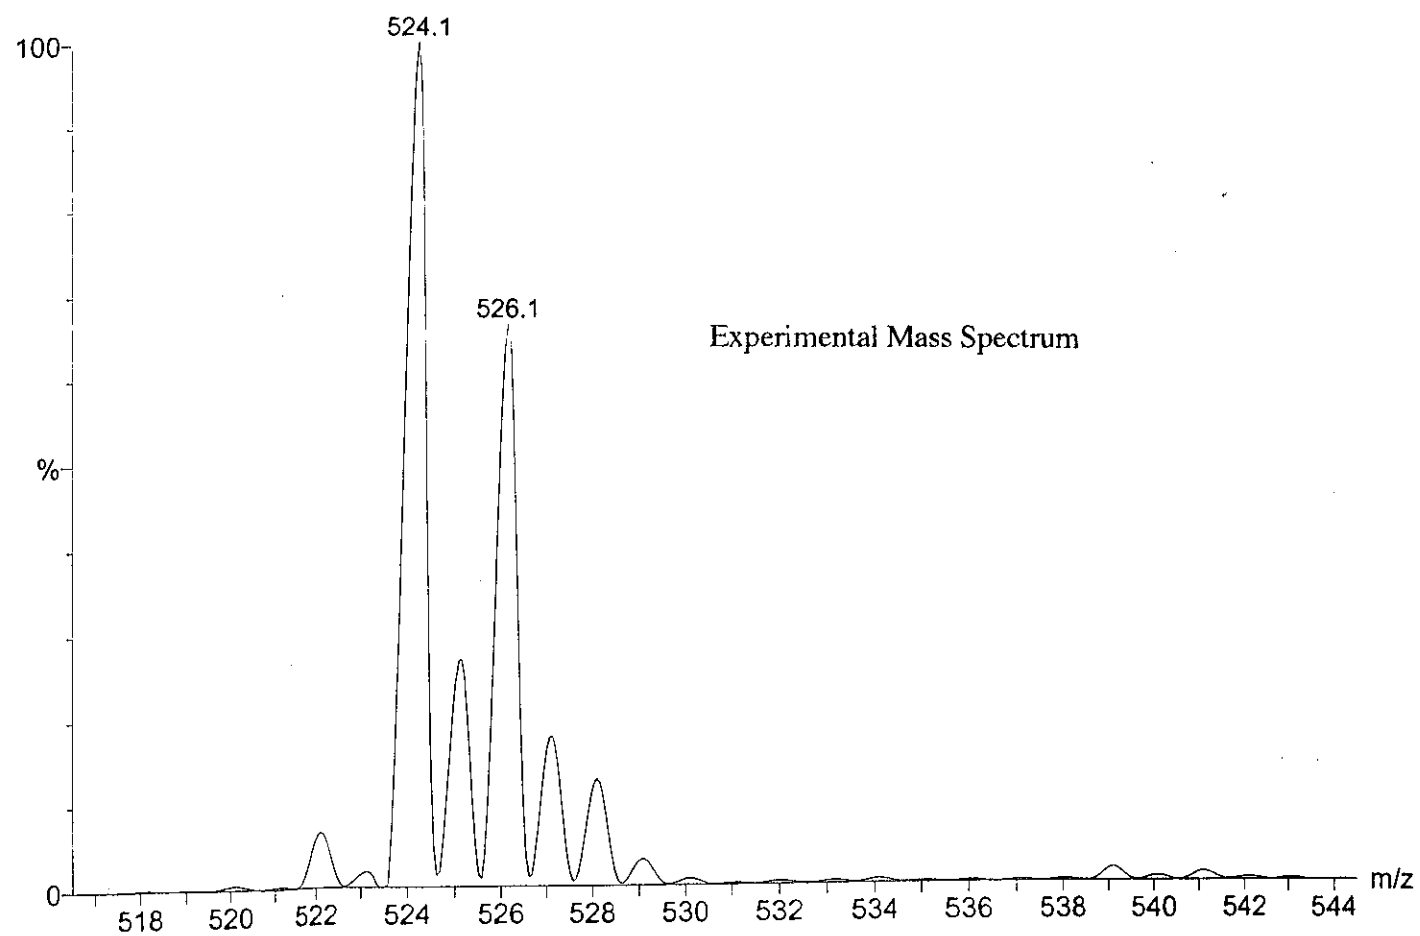

# Cyclic Voltammetry

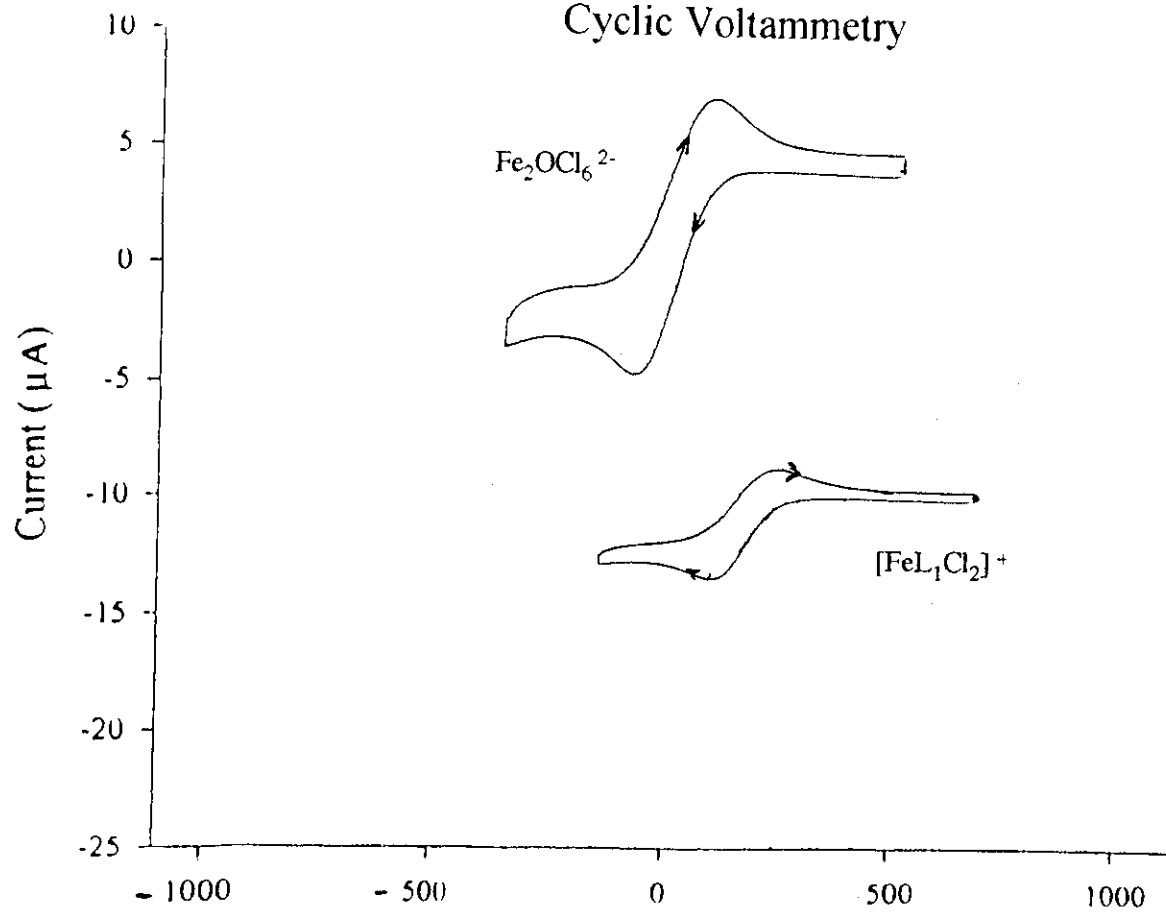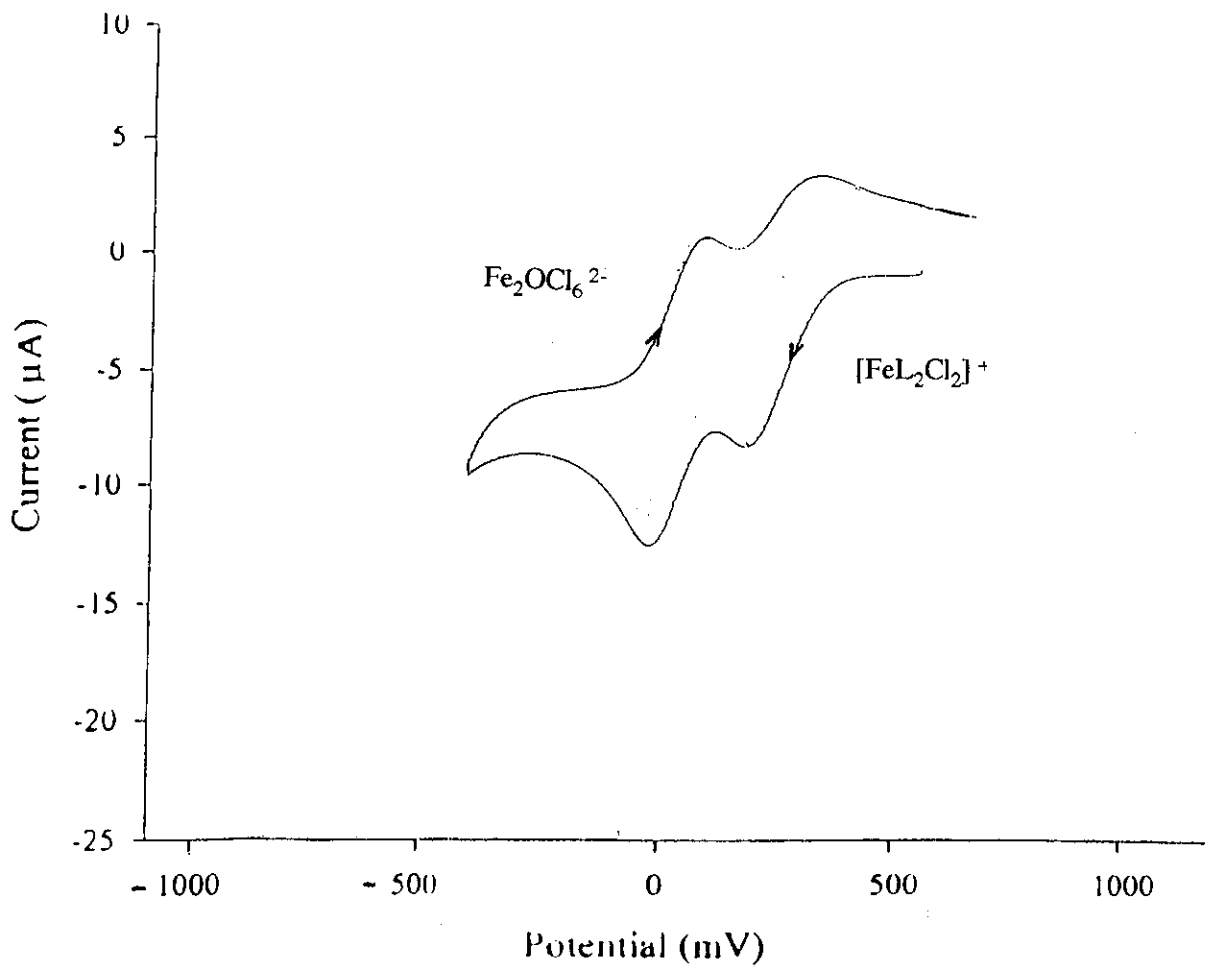

## Packing diagrams

Packing diagram for the anionic species  $\text{Fe}_2\text{OCl}_6^{2-}$

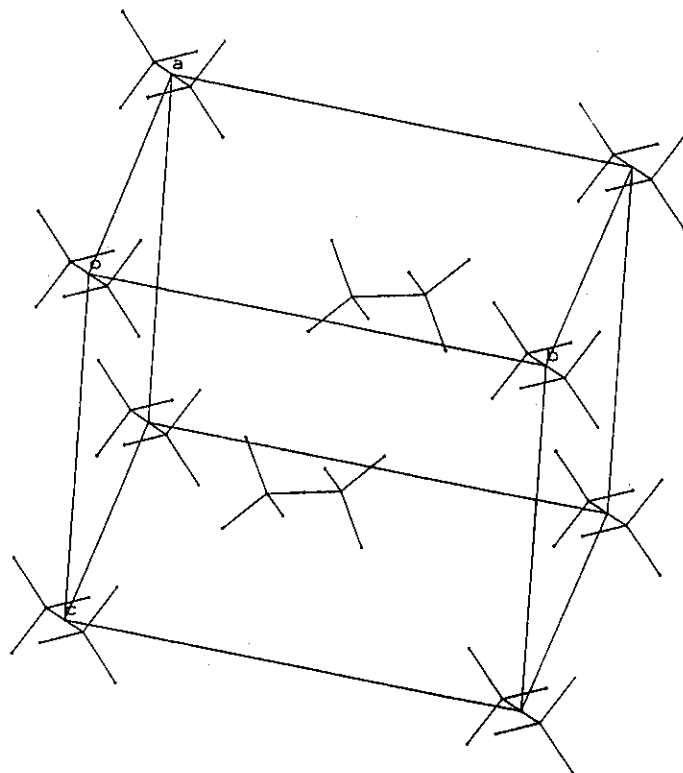

Packing diagram for the cationic species  $\text{Fe}(\text{L}_2)\text{Cl}_2^+$

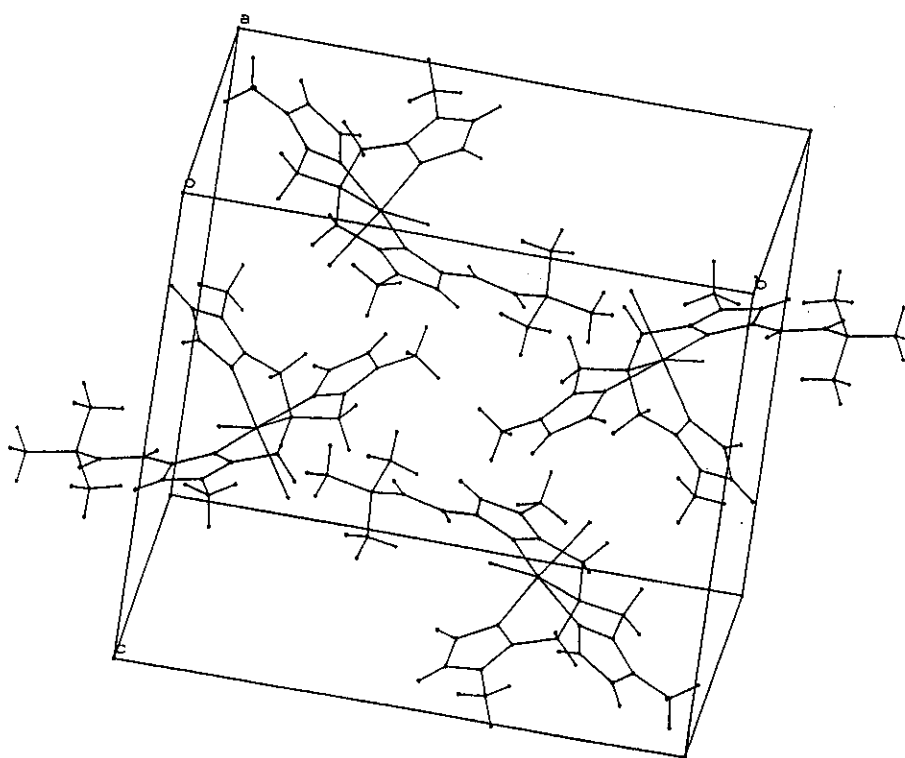

Supplement: b204799c.pdf [file b204799c.pdf]
